# Supplementary material for: The role of the intermolecular potential on the dynamics of ethylene confined in cylindrical nanopores
Source: Royal Society of Chemistry journal article supplement (doi:10.1039/c1ra00019e), 2011-01-01
Supplement: c1ra00019e.pdf [file c1ra00019e.pdf]

## SUPPLEMENTARY INFORMATION

**Liu's equation:**<sup>79</sup>

$$D = \frac{\kappa}{\beta^2 \rho} \exp\left(\frac{-0.75\beta^3 \rho}{1.2588 - \beta^3 \rho} - \gamma\right)$$

At constant temperature, the previous equation relates a bulk fluid self-diffusion coefficient,  $D$ , with the corresponding number density,  $\rho$ , using three numeric constants characteristic of each substance, namely  $\kappa$ ,  $\beta$ , and  $\gamma$ , according to:

$$\kappa = 21.16\sqrt{1000RT/M}$$

$$\beta = \sigma_{LJ} 2^{1/6} \left[ 1 + \sqrt{\frac{1.3229T}{\epsilon_{LJ}/k_B}} \right]^{-1/6}$$

$$\gamma = -\frac{0.27862(\epsilon_{LJ}/k_B)}{T}$$

where,  $k_B$  is the Boltzmann constant ( $1.38065 \times 10^{-23} \text{ J}\cdot\text{K}^{-1}$ ),  $R$  is the ideal gas constant ( $8.314472 \text{ J}\cdot\text{K}^{-1}\text{mol}^{-1}$ ) and  $M$  is the molecular mass. Thus, to obtain the complete  $(\rho, T)$  surface, the only inputs are the Lennard-Jones potential parameters of the fluid  $(\sigma_{LJ}, \epsilon_{LJ})$ .
